# Supplementary material for: The role of halogen bonds in the catalytic mechanism of the iso-Nazarov cyclization reaction: a DFT study
Source: Royal Society of Chemistry journal article supplement (doi:10.1039/d2cp01913b), 2022-01-01
Supplement: d2cp01913b1.pdf [file d2cp01913b1.pdf]

## Supporting Information

### The Role of Halogen Bond for the Catalytic Mechanism of Iso-Nazarov

#### Cyclization Reaction: A DFT Study

Yuanyuan Sun, Ying Li, Xiaoyan Li, Lingpeng Meng, Yanli Zeng\*

College of Chemistry and Materials Science, Hebei Key Laboratory of Inorganic Nano-  
materials, Hebei Normal University, Shijiazhuang, China, 050024

\*E-mail address: yanlizeng@hebtu.edu.cn

## Contents

|                                                                                                            |    |
|------------------------------------------------------------------------------------------------------------|----|
| 1. Structural Parameters .....                                                                             | 2  |
| 2. Energies and Cartesian Coordinates .....                                                                | 4  |
| 2.1 Uncat .....                                                                                            | 4  |
| 2.2 CatI <sub>2</sub> .....                                                                                | 7  |
| 2.3 CatIBr .....                                                                                           | 11 |
| 2.4 CatICl .....                                                                                           | 15 |
| 2.5 CatICl <sub>3</sub> .....                                                                              | 18 |
| CatICl <sub>3</sub> (a)—The indirect hydrogen proton transfer reaction pathway with H <sub>2</sub> O ..... | 23 |
| (a <sub>1</sub> ) One-step water co-catalyzed mechanism .....                                              | 23 |
| (a <sub>2</sub> ) Two-step hydrogen bond/ halogen bond co-catalyzed mechanism .....                        | 25 |
| CatICl <sub>3</sub> (b)—The direct proton transfer mechanism .....                                         | 30 |

## 1. Structural Parameters

**Table S1** C-C distances (in Å) along the reaction pathway in EtOAC solvent

|                  | COM1  | TS1   | COM2  |
|------------------|-------|-------|-------|
| I <sub>2</sub>   | 3.088 | 1.761 | 1.605 |
| IBr              | 3.067 | 1.781 | 1.604 |
| ICl              | 3.068 | 1.799 | 1.597 |
| ICl <sub>3</sub> | 3.016 | 1.920 | 1.570 |

**Table S2** O···I distances (in Å) along the reaction pathway in EtOAC solvent

|                  | COM1  | TS1   | COM2  |
|------------------|-------|-------|-------|
| I <sub>2</sub>   | 2.783 | 2.280 | 2.205 |
| IBr              | 2.566 | 2.249 | 2.194 |
| ICl              | 2.490 | 2.217 | 2.161 |
| ICl <sub>3</sub> | 2.403 | 2.169 | 2.063 |

**Table S3** Topological and energy properties of I···O interactions at the BCPs of the complexe I-XCOM1(X = I, Br, Cl) in EtOAC solvent (all values in a.u.)

|                       | $\rho(r)$ | $\nabla^2\rho(r)$ | $G_b$  | $H_b$   | $-G_b/V_b$ |
|-----------------------|-----------|-------------------|--------|---------|------------|
| I <sub>2</sub> COM1   | 0.0239    | 0.0758            | 0.0184 | 0.0006  | 1.0337     |
| IBrCOM1               | 0.0358    | 0.1078            | 0.0282 | -0.0013 | 0.9570     |
| IClCOM1               | 0.0413    | 0.1209            | 0.0330 | -0.0028 | 0.9213     |
| ICl <sub>3</sub> COM1 | 0.0555    | 0.1287            | 0.0398 | -0.0077 | 0.8379     |

**Table S4** Gibbs free energy (in kcal·mol<sup>-1</sup>) of the efficient carbon-carbon coupling, [1,2]-H shift process and direct hydrogen proton transfer process catalyzed by catalysts in EtOAC solvent

|                  | COM1 | TS1  | INT1 | TS2  | INT2  |
|------------------|------|------|------|------|-------|
| I <sub>2</sub>   | -1.1 | 27.2 | 26.4 | 30.6 | -14.4 |
| IBr              | -3.7 | 21.1 | 20.2 | 24.2 | -15.7 |
| ICl              | -4.8 | 17.3 | 15.7 | 21.4 | -17.4 |
| ICl <sub>3</sub> | -7.9 | 7.0  | 1.7  | 9.2  | -21.7 |

**Table S5** NPA charge (in e) of COM1 in EtOAc solvent

|                  | I      | O       | C(1)   | C(2)    | C(3)    | C(4)    | C(5)    |
|------------------|--------|---------|--------|---------|---------|---------|---------|
| I <sub>2</sub>   | 0.0437 | -0.5967 | 0.4125 | -0.1026 | -0.1313 | -0.2340 | -0.1617 |
| IBr              | 0.2182 | -0.6090 | 0.4249 | -0.1428 | -0.1162 | -0.2377 | -0.1537 |
| ICl              | 0.3070 | -0.6145 | 0.4298 | -0.1461 | -0.1083 | -0.2431 | -0.1410 |
| ICl <sub>3</sub> | 1.1845 | -0.6410 | 0.4345 | -0.1527 | -0.0827 | -0.2496 | -0.1346 |

**Table S6** Integral charge (in e) of the density difference between the region 1 and region 2 of COM1 in EtOAc solvent

|          | I <sub>2</sub> COM1 | IBrCOM1 | IClCOM1 | ICl <sub>3</sub> COM1 |
|----------|---------------------|---------|---------|-----------------------|
| region 1 | 0.0019              | 0.0076  | 0.0104  | 0.0081                |
| region 2 | -0.0503             | -0.0506 | -0.0568 | -0.0817               |

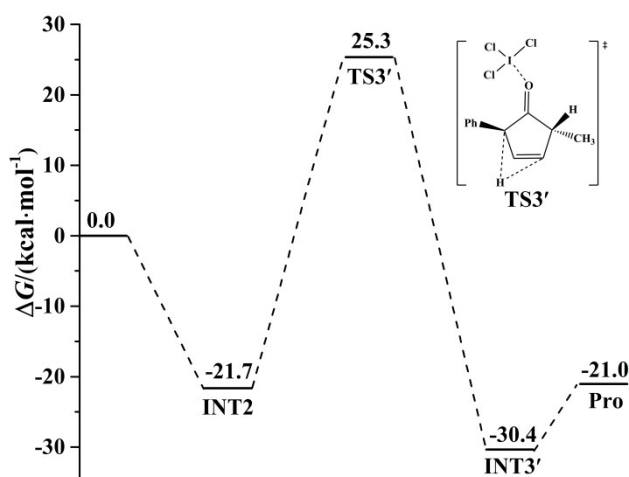**Fig. S1.** Potential energy curves of the direct proton transfer mechanism catalyzed by halogen bond catalyst ICl<sub>3</sub> in EtOAc solvent.**the direct proton transfer mechanism**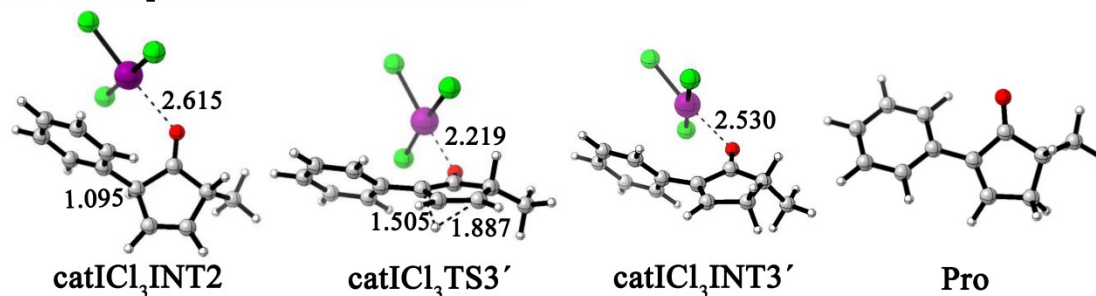**Fig. S2.** Geometries and key bonds (in Å) of stationary points on the PES of the direct proton transfer mechanism catalyzed by ICl<sub>3</sub>.

## 2. Energies and Cartesian Coordinates

Our initial configuration parameters and the coordination modes of the catalysts are based on the configuration coordinates given by Riveira and Gandon et al., which have been reported before (reference 38 in the manuscript).

### 2.1 Uncat

#### 5-phenyl-2,4-pentadienal

Entropic correction (in solution) = -539.43289 Hartree

Sum of electronic and zero-point Energies = -539.403810 Hartree

Sum of electronic and thermal Free Energies = -539.443379 Hartree

|   |             |             |             |
|---|-------------|-------------|-------------|
| C | -0.09339300 | -0.15909600 | -0.36544600 |
| C | 2.64237500  | 0.90393200  | 0.67647600  |
| C | 0.66936000  | -1.23203600 | -0.10002000 |
| H | 0.37915800  | 0.71680800  | -0.80551800 |
| C | -1.54621700 | -0.05314100 | -0.17272300 |
| C | 3.01391700  | -0.31549000 | -0.07135400 |
| H | 1.68989300  | 0.87292400  | 1.22985100  |
| O | 3.36002200  | 1.87931900  | 0.74668100  |
| C | 2.11115800  | -1.28781900 | -0.31700400 |
| C | 4.45755400  | -0.43073800 | -0.46516400 |
| H | 0.20448500  | -2.15760300 | 0.22978700  |
| C | -2.29965100 | -1.02670700 | 0.49915200  |
| C | -2.20864200 | 1.07294000  | -0.67657200 |
| H | 2.48251000  | -2.22302200 | -0.73343000 |
| H | 5.11069000  | -0.31893500 | 0.40407600  |
| H | 4.65635700  | -1.39182800 | -0.94011500 |
| H | 4.72284600  | 0.36747200  | -1.16383800 |
| C | -3.67160000 | -0.87935800 | 0.64753600  |
| H | -1.81171500 | -1.90039100 | 0.91612300  |
| C | -3.58335300 | 1.22127700  | -0.52638800 |
| H | -1.63520900 | 1.83688100  | -1.19168300 |
| C | -4.32006700 | 0.24408400  | 0.13478400  |
| H | -4.23926500 | -1.64059400 | 1.17047900  |
| H | -4.07729900 | 2.10009400  | -0.92469300 |
| H | -5.39128100 | 0.35655600  | 0.25584700  |

#### Uncat-TS1

Imaginary frequency -615.64 cm<sup>-1</sup>

Entropic correction (in solution) = -539.36739 Hartree

Sum of electronic and zero-point Energies = -539.340261 Hartree

Sum of electronic and thermal Free Energies = -539.377942 Hartree

|   |             |             |             |
|---|-------------|-------------|-------------|
| C | -0.39774100 | 0.01811100  | -0.75233600 |
| C | -1.44196800 | -0.70894700 | 0.25360700  |

|   |             |             |             |
|---|-------------|-------------|-------------|
| C | -1.02821000 | 1.34066300  | -0.96654400 |
| H | -0.53494500 | -0.59673600 | -1.64764500 |
| C | 1.04315300  | 0.03552600  | -0.34127400 |
| C | -2.62302200 | 0.15395700  | 0.13769900  |
| H | -1.22679400 | -0.06592700 | 1.21614400  |
| O | -1.45461500 | -1.97480100 | 0.42310200  |
| C | -2.30278400 | 1.38863200  | -0.50035600 |
| C | -3.93853600 | -0.27240700 | 0.63787300  |
| H | -0.48179200 | 2.19517000  | -1.35284900 |
| C | 1.49855200  | 0.99016300  | 0.57316700  |
| C | 1.94044500  | -0.91523500 | -0.82820800 |
| H | -2.96371000 | 2.24517600  | -0.53840400 |
| H | -4.60292900 | 0.56290600  | 0.85777200  |
| H | -4.39554700 | -0.88572500 | -0.15141600 |
| H | -3.82078700 | -0.93044400 | 1.50140200  |
| C | 2.82736600  | 1.00276200  | 0.98150600  |
| H | 0.80243200  | 1.72296600  | 0.97403400  |
| C | 3.27026500  | -0.90848000 | -0.41588600 |
| H | 1.59227100  | -1.66435800 | -1.53160000 |
| C | 3.71755600  | 0.05212700  | 0.48621500  |
| H | 3.16818000  | 1.74973000  | 1.68944500  |
| H | 3.95692700  | -1.65396800 | -0.80062100 |
| H | 4.75316000  | 0.05837600  | 0.80615300  |

### Uncat-INT1

Entropic correction (in solution) = -539.45428 Hartree

Sum of electronic and zero-point Energies = -539.426432 Hartree

Sum of electronic and thermal Free Energies = -539.464850 Hartree

|   |             |             |             |
|---|-------------|-------------|-------------|
| C | -0.44076500 | 0.08778400  | 0.92374700  |
| C | -1.33677200 | 0.75478400  | -0.13959800 |
| C | -1.14702300 | -1.22396000 | 1.14920500  |
| H | -0.45247100 | 0.72063400  | 1.81729300  |
| C | 0.98817000  | -0.01571100 | 0.42653400  |
| C | -2.41852700 | -0.22949900 | -0.58718100 |
| H | -2.20433200 | -0.51029900 | -1.62649400 |
| O | -1.21588500 | 1.88414100  | -0.53249100 |
| C | -2.19397900 | -1.39297100 | 0.34229400  |
| C | -3.81422500 | 0.39263600  | -0.51746700 |
| H | -0.80653700 | -1.93870800 | 1.88946400  |
| C | 1.38220300  | -1.05410700 | -0.42008200 |
| C | 1.91886400  | 0.96654000  | 0.77017900  |
| H | -2.83905200 | -2.26466300 | 0.33974600  |
| H | -4.56809000 | -0.32821800 | -0.84028000 |
| H | -4.04716000 | 0.69956500  | 0.50533900  |
| H | -3.87281300 | 1.26890400  | -1.16534600 |

|   |            |             |             |
|---|------------|-------------|-------------|
| C | 2.68414300 | -1.11057200 | -0.90938400 |
| H | 0.66851300 | -1.82405400 | -0.69504000 |
| C | 3.22035600 | 0.91111600  | 0.28093300  |
| H | 1.62026600 | 1.77722700  | 1.42672600  |
| C | 3.60705400 | -0.12851300 | -0.56037000 |
| H | 2.97745900 | -1.92378900 | -1.56372800 |
| H | 3.93292200 | 1.67936600  | 0.55918500  |
| H | 4.62137800 | -0.17425100 | -0.93980700 |

### Uncat-TS2

Imaginary frequency -1061.37 cm<sup>-1</sup>

Entropic correction (in solution) = -539.36214 Hartree

Sum of electronic and zero-point Energies = -539.334780 Hartree

Sum of electronic and thermal Free Energies = -539.372706 Hartree

|   |             |             |             |
|---|-------------|-------------|-------------|
| C | 0.39004500  | 0.33597100  | -0.13771800 |
| C | 1.41038300  | -0.67197600 | -0.23539900 |
| C | 1.09304500  | 1.64493000  | 0.00770400  |
| H | 1.11761900  | 1.14719400  | 1.07771000  |
| C | -1.04946400 | 0.15111600  | -0.04022600 |
| C | 2.77068000  | 0.05249100  | -0.28436200 |
| H | 3.00706500  | 0.01707000  | -1.36639300 |
| O | 1.30774100  | -1.89695400 | -0.31559100 |
| C | 2.47680000  | 1.48283100  | -0.05136200 |
| C | 3.88886000  | -0.60206300 | 0.51295200  |
| H | 0.59574900  | 2.60500400  | 0.05264100  |
| C | -1.93746900 | 1.24293600  | -0.07030600 |
| C | -1.60087600 | -1.14076800 | 0.06461500  |
| H | 3.20598700  | 2.27382500  | 0.05979500  |
| H | 3.97862400  | -1.65022500 | 0.22562200  |
| H | 4.84395600  | -0.10415100 | 0.33630800  |
| H | 3.66541300  | -0.55749400 | 1.58146200  |
| C | -3.31068800 | 1.05271600  | 0.01482900  |
| H | -1.55561900 | 2.25253500  | -0.16939700 |
| C | -2.97651500 | -1.32154600 | 0.14077600  |
| H | -0.93514300 | -1.99344600 | 0.08088600  |
| C | -3.84244300 | -0.23056800 | 0.12072400  |
| H | -3.97009800 | 1.91343400  | -0.00965600 |
| H | -3.37524300 | -2.32713300 | 0.21983500  |
| H | -4.91440400 | -0.37739500 | 0.18254700  |

### Uncat-Pro

Entropic correction (in solution) = -539.46642 Hartree

Sum of electronic and zero-point Energies = -539.438861 Hartree

Sum of electronic and thermal Free Energies = -539.476977 Hartree

|   |            |             |             |
|---|------------|-------------|-------------|
| C | 0.40092100 | 0.41327700  | -0.01581800 |
| C | 1.41278900 | -0.60016200 | -0.43020700 |

|   |             |             |             |
|---|-------------|-------------|-------------|
| C | 1.04536900  | 1.54569200  | 0.30863900  |
| C | -1.05304700 | 0.17450600  | 0.01471400  |
| C | 2.79712200  | 0.03828300  | -0.34726800 |
| H | 3.19906000  | 0.05269800  | -1.36468700 |
| O | 1.19679900  | -1.73984500 | -0.77541800 |
| C | 2.53604200  | 1.46482100  | 0.15760800  |
| C | 3.71727000  | -0.78779900 | 0.54933200  |
| H | 0.55311400  | 2.44429500  | 0.66676800  |
| C | -1.94448400 | 1.20878800  | -0.29480300 |
| C | -1.56799900 | -1.07849400 | 0.36541700  |
| H | 3.02618600  | 1.65593500  | 1.11815900  |
| H | 3.80230700  | -1.80959000 | 0.17496500  |
| H | 4.71565600  | -0.34681000 | 0.58541800  |
| H | 3.32273900  | -0.82564600 | 1.56899800  |
| C | -3.31751300 | 1.00072300  | -0.24077900 |
| H | -1.55567000 | 2.17684300  | -0.59251600 |
| C | -2.94303400 | -1.28404800 | 0.41871600  |
| H | -0.88968000 | -1.88900800 | 0.60000000  |
| C | -3.82152100 | -0.24750000 | 0.11702700  |
| H | -3.99466300 | 1.81098900  | -0.48612700 |
| H | -3.32840000 | -2.25842400 | 0.69690000  |
| H | -4.89226100 | -0.41200000 | 0.15528600  |
| H | 2.89572400  | 2.23095500  | -0.53528900 |

## 2.2 CatI<sub>2</sub>

### CatI<sub>2</sub>

Entropic correction (in solution) = -595.29686 Hartree

Sum of electronic and zero-point Energies = -595.279868 Hartree

Sum of electronic and thermal Free Energies = -595.305554 Hartree

|   |            |            |            |
|---|------------|------------|------------|
| I | 0.00000000 | 0.00000000 | 1.32792700 |
|---|------------|------------|------------|

|   |            |            |             |
|---|------------|------------|-------------|
| I | 0.00000000 | 0.00000000 | -1.32792700 |
|---|------------|------------|-------------|

### CatI<sub>2</sub>-COM1

Entropic correction (in solution) = -1134.73146 Hartree

Sum of electronic and zero-point Energies = -1134.690263 Hartree

Sum of electronic and thermal Free Energies = -1134.741618 Hartree

|   |             |             |             |
|---|-------------|-------------|-------------|
| C | -3.55300200 | 0.35790400  | 0.23359300  |
| C | -1.17368900 | 2.30498000  | -0.06012200 |
| C | -3.94736600 | 1.33252800  | -0.60361400 |
| H | -2.94426800 | 0.62773600  | 1.09451500  |
| C | -3.91546100 | -1.06259600 | 0.14814300  |
| C | -2.33582600 | 3.20154800  | -0.12261900 |
| H | -1.27201000 | 1.31765500  | -0.53654300 |
| O | -0.10894900 | 2.63931200  | 0.43266700  |

|   |             |             |             |
|---|-------------|-------------|-------------|
| C | -3.55331800 | 2.72852600  | -0.46854700 |
| C | -2.06910900 | 4.65439100  | 0.14305400  |
| H | -4.66185400 | 1.11394900  | -1.39297100 |
| C | -4.51738800 | -1.62731500 | -0.98549600 |
| C | -3.63865600 | -1.89148500 | 1.24230900  |
| H | -4.33896700 | 3.45828500  | -0.65781200 |
| H | -2.96831500 | 5.24934400  | -0.01812900 |
| H | -1.73704200 | 4.79449700  | 1.17541700  |
| H | -1.27057300 | 5.03058500  | -0.50122200 |
| C | -4.84644600 | -2.97537800 | -1.01098200 |
| H | -4.71906900 | -1.01423500 | -1.85648000 |
| C | -3.96815000 | -3.24223700 | 1.21618300  |
| H | -3.16290500 | -1.46645400 | 2.12021200  |
| C | -4.57542100 | -3.78793200 | 0.08977400  |
| H | -5.30897300 | -3.39861700 | -1.89528300 |
| H | -3.74785700 | -3.86764500 | 2.07358800  |
| H | -4.83049900 | -4.84103100 | 0.06387900  |
| I | 1.87654300  | 0.70774100  | 0.16019100  |
| I | 3.67811600  | -1.23748000 | -0.19907000 |

### CatI<sub>2</sub>-TS1

Imaginary frequency -257.39 cm<sup>-1</sup>

Entropic correction (in solution) = -1134.68646 Hartree

Sum of electronic and zero-point Energies = -1134.649386 Hartree

Sum of electronic and thermal Free Energies = -1134.696726 Hartree

|   |            |             |             |
|---|------------|-------------|-------------|
| C | 3.00956800 | 0.57373300  | 0.37459200  |
| C | 2.35034100 | -0.98174600 | -0.12300700 |
| C | 4.22572100 | 0.53298200  | -0.40500100 |
| H | 3.17865300 | 0.27519600  | 1.40975100  |
| C | 2.08051400 | 1.72324400  | 0.24274100  |
| C | 3.63930700 | -1.66037700 | -0.34403000 |
| H | 1.97071200 | -0.63406700 | -1.10208000 |
| O | 1.47094000 | -1.53901100 | 0.67275400  |
| C | 4.64940000 | -0.75484600 | -0.66523500 |
| C | 3.77576300 | -3.11536100 | -0.16075800 |
| H | 4.69849700 | 1.42373200  | -0.80849900 |
| C | 1.82567200 | 2.28160800  | -1.01342700 |
| C | 1.40185100 | 2.21379000  | 1.35991400  |
| H | 5.60598400 | -1.03013200 | -1.09031000 |
| H | 4.70092600 | -3.49435600 | -0.59349200 |
| H | 3.78908600 | -3.31533700 | 0.91873800  |
| H | 2.90313400 | -3.63960400 | -0.55723300 |
| C | 0.91670600 | 3.32406700  | -1.14701600 |
| H | 2.32406800 | 1.88103500  | -1.89243700 |
| C | 0.48922000 | 3.25419500  | 1.22599000  |



|   |             |             |             |
|---|-------------|-------------|-------------|
| H | 1.58262200  | 1.76868600  | 2.33296600  |
| C | 0.24554200  | 3.81004900  | -0.02681400 |
| H | 0.71956300  | 3.74789700  | -2.12480400 |
| H | -0.03830800 | 3.62471000  | 2.09714200  |
| H | -0.47350900 | 4.61406400  | -0.13286400 |
| I | -0.69183200 | -0.94090300 | 0.26973400  |
| I | -3.35319800 | -0.19339500 | -0.26495300 |

### CatI<sub>2</sub>-INT1

Entropic correction (in solution) = -1134.68770 Hartree

Sum of electronic and zero-point Energies = -1134.649854 Hartree

Sum of electronic and thermal Free Energies = -1134.697967 Hartree

|   |             |             |             |
|---|-------------|-------------|-------------|
| C | 2.90969300  | 0.39234200  | 0.51651800  |
| C | 2.29910900  | -0.96895300 | -0.07605500 |
| C | 4.27273900  | 0.35994900  | -0.04577000 |
| H | 2.98030300  | 0.17104700  | 1.58854600  |
| C | 2.11815900  | 1.64381600  | 0.28209300  |
| C | 3.53067700  | -1.74257500 | -0.37409400 |
| H | 1.95276500  | -0.65013700 | -1.08641800 |
| O | 1.36374200  | -1.61789500 | 0.64245600  |
| C | 4.63830200  | -0.88965200 | -0.47635200 |
| C | 3.51998000  | -3.20152700 | -0.48371500 |
| H | 4.89432600  | 1.24665300  | -0.12775500 |
| C | 2.08483600  | 2.21844500  | -0.99055200 |
| C | 1.36842000  | 2.21515800  | 1.30986600  |
| H | 5.61453500  | -1.17951500 | -0.84107700 |
| H | 4.41234000  | -3.59050200 | -0.97143700 |
| H | 3.48094200  | -3.59214700 | 0.54390400  |
| H | 2.60176700  | -3.54570200 | -0.96526500 |
| C | 1.31570800  | 3.35124800  | -1.23129900 |
| H | 2.64987800  | 1.76627600  | -1.80224100 |
| C | 0.59368200  | 3.34507200  | 1.06872700  |
| H | 1.38020200  | 1.76269500  | 2.29605000  |
| C | 0.56640000  | 3.91444200  | -0.20116500 |
| H | 1.29175700  | 3.78742300  | -2.22318600 |
| H | 0.00554400  | 3.77617000  | 1.87044300  |
| H | -0.04287500 | 4.79052900  | -0.39058400 |
| I | -0.70566000 | -0.95487600 | 0.26880000  |
| I | -3.39693700 | -0.09467600 | -0.24653300 |

### CatI<sub>2</sub>-TS2

Imaginary frequency -741.29 cm<sup>-1</sup>

Entropic correction (in solution) = -1134.68101 Hartree

Sum of electronic and zero-point Energies = -1134.643773 Hartree

Sum of electronic and thermal Free Energies = -1134.691311 Hartree

|   |             |            |             |
|---|-------------|------------|-------------|
| C | -2.97908500 | 0.54843700 | -0.52734300 |
|---|-------------|------------|-------------|

|   |             |             |             |
|---|-------------|-------------|-------------|
| C | -2.45653200 | -0.88722200 | -0.24328200 |
| C | -4.25250200 | 0.58878900  | 0.25374700  |
| H | -3.22909000 | 0.52501700  | -1.59582900 |
| C | -2.00533500 | 1.66800700  | -0.26062100 |
| C | -3.53857500 | -1.56789800 | 0.42413500  |
| H | -2.19477800 | -0.84263800 | 0.93413100  |
| O | -1.53311600 | -1.47904200 | -0.95633000 |
| C | -4.56640400 | -0.61648000 | 0.77402800  |
| C | -3.54929300 | -3.01708700 | 0.68214700  |
| H | -4.80090700 | 1.50835200  | 0.42333500  |
| C | -1.69269300 | 2.01754400  | 1.05472600  |
| C | -1.35101800 | 2.30714100  | -1.31118100 |
| H | -5.42145300 | -0.85739900 | 1.39092500  |
| H | -2.53884500 | -3.42526700 | 0.65885200  |
| H | -4.06067500 | -3.26518000 | 1.61211300  |
| H | -4.10651300 | -3.47619600 | -0.14536400 |
| C | -0.72842600 | 2.98334200  | 1.31568900  |
| H | -2.19271300 | 1.51450900  | 1.87903800  |
| C | -0.38257300 | 3.27323200  | -1.05143800 |
| H | -1.58458900 | 2.03183800  | -2.33437700 |
| C | -0.06674500 | 3.60910200  | 0.26083300  |
| H | -0.48480600 | 3.24105400  | 2.33991800  |
| H | 0.13075500  | 3.75598300  | -1.87497600 |
| H | 0.69406000  | 4.35401900  | 0.46312100  |
| I | 0.65293400  | -0.88684000 | -0.40902900 |
| I | 3.26158600  | -0.22020200 | 0.32735200  |

### CatI<sub>2</sub>-INT2

Entropic correction (in solution) = -1134.75276 Hartree

Sum of electronic and zero-point Energies = -1134.713752 Hartree

Sum of electronic and thermal Free Energies = -1134.763064 Hartree

|   |            |             |             |
|---|------------|-------------|-------------|
| C | 3.15267600 | 0.55258500  | 0.67685600  |
| C | 2.93813900 | -0.85607300 | 0.09903400  |
| C | 4.50397700 | 0.91584700  | 0.10890800  |
| H | 3.20203300 | 0.44914300  | 1.76806000  |
| C | 2.01929300 | 1.49193000  | 0.33150000  |
| C | 4.20174200 | -1.31734700 | -0.61910500 |
| H | 3.93165300 | -1.60444300 | -1.64154000 |
| O | 1.92428300 | -1.50330200 | 0.19294500  |
| C | 5.05695800 | -0.07874600 | -0.58430000 |
| C | 4.82267100 | -2.52718900 | 0.09099600  |
| H | 4.94733100 | 1.89095000  | 0.27224700  |
| C | 1.73063700 | 1.77426800  | -1.00633100 |
| C | 1.22667500 | 2.05536400  | 1.32973200  |
| H | 6.02756400 | -0.03461400 | -1.06511900 |

|   |             |             |             |
|---|-------------|-------------|-------------|
| H | 4.13029100  | -3.37104500 | 0.08194100  |
| H | 5.74276900  | -2.82736600 | -0.41414900 |
| H | 5.06472000  | -2.28182400 | 1.12824600  |
| C | 0.65794400  | 2.59319200  | -1.33830200 |
| H | 2.34499300  | 1.34012100  | -1.79042100 |
| C | 0.15432000  | 2.88045200  | 0.99950500  |
| H | 1.44249500  | 1.83644800  | 2.37046200  |
| C | -0.13590700 | 3.14589100  | -0.33469400 |
| H | 0.43652500  | 2.79666700  | -2.37985500 |
| H | -0.45881900 | 3.30729700  | 1.78515000  |
| H | -0.97593000 | 3.78029500  | -0.59342800 |
| I | -0.90378200 | -0.82959100 | 0.12126300  |
| I | -3.49630500 | -0.24656500 | -0.11348800 |

### 2.3 CatIBr

CatIBr

Entropic correction (in solution) = -2871.82620 Hartree

Sum of electronic and zero-point Energies = -2871.809210 Hartree

Sum of electronic and thermal Free Energies = -2871.834778 Hartree

|    |            |            |             |
|----|------------|------------|-------------|
| I  | 0.00000000 | 0.00000000 | 0.98588200  |
| Br | 0.00000000 | 0.00000000 | -1.49290700 |

**CatIBr-COM1**

Entropic correction (in solution) = -3411.26498 Hartree

Sum of electronic and zero-point Energies = -3411.224501 Hartree

Sum of electronic and thermal Free Energies = -3411.275196 Hartree

|   |             |             |             |
|---|-------------|-------------|-------------|
| C | 3.07519600  | -0.61982800 | 0.26505800  |
| C | 0.43479600  | -2.13783000 | -0.09999200 |
| C | 3.34938300  | -1.68714500 | -0.50615800 |
| H | 2.37751100  | -0.74145600 | 1.09163000  |
| C | 3.68424800  | 0.71081500  | 0.15326600  |
| C | 1.41218400  | -3.22369600 | -0.05549500 |
| H | 0.72389700  | -1.20863000 | -0.61103700 |
| O | -0.70001600 | -2.25834900 | 0.34780700  |
| C | 2.71122200  | -2.98450400 | -0.34911900 |
| C | 0.88254200  | -4.59256800 | 0.25818800  |
| H | 4.14443800  | -1.63318100 | -1.24506300 |
| C | 4.42820800  | 1.11280000  | -0.96524500 |
| C | 3.50682300  | 1.62021500  | 1.20325100  |
| H | 3.36313400  | -3.84835300 | -0.46775600 |
| H | 1.67160700  | -5.33968100 | 0.17140500  |
| H | 0.48628600  | -4.62005200 | 1.27690300  |
| H | 0.06133800  | -4.85957100 | -0.41129500 |
| C | 4.99236200  | 2.37967000  | -1.01739500 |

|    |             |             |             |
|----|-------------|-------------|-------------|
| H  | 4.55549300  | 0.43825600  | -1.80429600 |
| C  | 4.07170200  | 2.88960300  | 1.15009000  |
| H  | 2.92274700  | 1.32269800  | 2.06809100  |
| C  | 4.81862600  | 3.27196000  | 0.04042000  |
| H  | 5.56290300  | 2.67798100  | -1.88944400 |
| H  | 3.92599800  | 3.57989100  | 1.97289200  |
| H  | 5.25745400  | 4.26191500  | -0.00607600 |
| I  | -2.28583400 | -0.25884200 | 0.07872900  |
| Br | -3.78592100 | 1.75196100  | -0.21606500 |

### CatIBr-TS1

Imaginary frequency -277.33 cm<sup>-1</sup>

Entropic correction (in solution) = -3411.22549 Hartree

Sum of electronic and zero-point Energies = -3411.189343 Hartree

Sum of electronic and thermal Free Energies = -3411.235806 Hartree

|    |             |             |             |
|----|-------------|-------------|-------------|
| C  | 2.64318300  | 0.56169700  | 0.40273500  |
| C  | 1.96215800  | -0.99837500 | -0.12216000 |
| C  | 3.86926900  | 0.49268900  | -0.35293900 |
| H  | 2.77397200  | 0.24363700  | 1.43705100  |
| C  | 1.73654900  | 1.72484400  | 0.25391800  |
| C  | 3.24728700  | -1.69316600 | -0.29724000 |
| H  | 1.61377100  | -0.63042400 | -1.10360400 |
| O  | 1.05405900  | -1.53805100 | 0.65181300  |
| C  | 4.27808400  | -0.80494200 | -0.59468900 |
| C  | 3.35815200  | -3.14912500 | -0.09567400 |
| H  | 4.36168200  | 1.37189800  | -0.75827500 |
| C  | 1.53495400  | 2.30359100  | -1.00260800 |
| C  | 1.02789100  | 2.21237700  | 1.35388100  |
| H  | 5.24172500  | -1.09800600 | -0.99104600 |
| H  | 4.29694400  | -3.54142300 | -0.48487800 |
| H  | 3.32143000  | -3.34219400 | 0.98428900  |
| H  | 2.49905900  | -3.66718900 | -0.52834600 |
| C  | 0.65053900  | 3.36445200  | -1.15304300 |
| H  | 2.05624900  | 1.90511300  | -1.86901000 |
| C  | 0.13939200  | 3.27099800  | 1.20274900  |
| H  | 1.16723400  | 1.75146400  | 2.32635400  |
| C  | -0.04985700 | 3.84815000  | -0.04983100 |
| H  | 0.49498700  | 3.80465100  | -2.13112700 |
| H  | -0.41184700 | 3.63948400  | 2.05997000  |
| H  | -0.75007900 | 4.66677500  | -0.16950200 |
| I  | -1.07043200 | -0.95135600 | 0.20658600  |
| Br | -3.56429400 | -0.26219000 | -0.34874300 |

### CatIBr-INT1

Entropic correction (in solution) = -3411.22691 Hartree

Sum of electronic and zero-point Energies = -3411.190064 Hartree

Sum of electronic and thermal Free Energies = -3411.237218 Hartree

|    |             |             |             |
|----|-------------|-------------|-------------|
| C  | 2.57057700  | 0.28996600  | 0.51950800  |
| C  | 1.86194600  | -1.03223000 | -0.04896600 |
| C  | 3.92405800  | 0.15359900  | -0.04983400 |
| H  | 2.63302500  | 0.07760800  | 1.59379500  |
| C  | 1.86603300  | 1.59019500  | 0.27510600  |
| C  | 3.03362000  | -1.89626400 | -0.34013100 |
| H  | 1.53263100  | -0.70653100 | -1.06239300 |
| O  | 0.88664300  | -1.59875400 | 0.68623800  |
| C  | 4.19807700  | -1.12542000 | -0.46218300 |
| C  | 2.91848300  | -3.35235500 | -0.42578000 |
| H  | 4.60617100  | 0.99283900  | -0.14917500 |
| C  | 1.86501300  | 2.15382900  | -1.00309500 |
| C  | 1.16619500  | 2.22286100  | 1.30204400  |
| H  | 5.14924700  | -1.48886300 | -0.82695100 |
| H  | 3.77870600  | -3.81163600 | -0.91004500 |
| H  | 2.85597600  | -3.72262600 | 0.60817300  |
| H  | 1.97606000  | -3.63796600 | -0.89885500 |
| C  | 1.17856600  | 3.33743700  | -1.24894000 |
| H  | 2.38913500  | 1.65420800  | -1.81427400 |
| C  | 0.47470500  | 3.40454400  | 1.05581500  |
| H  | 1.15284000  | 1.77928500  | 2.29225900  |
| C  | 0.48057000  | 3.96352600  | -0.21882900 |
| H  | 1.17876900  | 3.76560700  | -2.24462200 |
| H  | -0.07386200 | 3.88490800  | 1.85763700  |
| H  | -0.06347600 | 4.88085000  | -0.41193000 |
| I  | -1.14116400 | -0.89338000 | 0.23667600  |
| Br | -3.62725000 | -0.05104700 | -0.34844600 |

### CatIBr-TS2

Imaginary frequency -778.57 cm<sup>-1</sup>

Entropic correction (in solution) = -3411.22058 Hartree

Sum of electronic and zero-point Energies = -3411.183394 Hartree

Sum of electronic and thermal Free Energies = -3411.230926 Hartree

|   |             |             |             |
|---|-------------|-------------|-------------|
| C | -2.59271100 | 0.52391000  | -0.58515700 |
| C | -2.06997600 | -0.89879500 | -0.26321500 |
| C | -3.90523800 | 0.55478700  | 0.13157800  |
| H | -2.78844600 | 0.48956500  | -1.66464500 |
| C | -1.65139300 | 1.66222500  | -0.28004100 |
| C | -3.16363300 | -1.58749000 | 0.36902200  |
| H | -1.87811300 | -0.85393800 | 0.93526900  |
| O | -1.10364200 | -1.48974600 | -0.92061000 |
| C | -4.22334300 | -0.64613100 | 0.65653200  |
| C | -3.16609100 | -3.03370900 | 0.64733800  |
| H | -4.47655700 | 1.46748800  | 0.25501200  |

|    |             |             |             |
|----|-------------|-------------|-------------|
| C  | -1.41021900 | 2.02638500  | 1.04599800  |
| C  | -0.96540200 | 2.31236200  | -1.30323500 |
| H  | -5.10236100 | -0.89385100 | 1.23576000  |
| H  | -2.15261100 | -3.43433700 | 0.64834300  |
| H  | -3.69112500 | -3.27098000 | 1.57262100  |
| H  | -3.70816300 | -3.50833400 | -0.18117200 |
| C  | -0.48771500 | 3.02124200  | 1.34549500  |
| H  | -1.93655200 | 1.51676700  | 1.84939900  |
| C  | -0.03847300 | 3.30750100  | -1.00463600 |
| H  | -1.14361000 | 2.02475200  | -2.33424000 |
| C  | 0.20388900  | 3.66084700  | 0.31864100  |
| H  | -0.30076700 | 3.29177700  | 2.37831600  |
| H  | 0.49942500  | 3.80035500  | -1.80621400 |
| H  | 0.93105900  | 4.43007600  | 0.55145300  |
| I  | 1.01837800  | -0.90462700 | -0.32563400 |
| Br | 3.46927800  | -0.30328500 | 0.42039100  |

### CatIBr-INT2

Entropic correction (in solution) = -3411.28414 Hartree

Sum of electronic and zero-point Energies = -3411.246567 Hartree

Sum of electronic and thermal Free Energies = -3411.294484 Hartree

|   |             |             |             |
|---|-------------|-------------|-------------|
| C | -2.60220000 | 0.47368700  | -0.74436000 |
| C | -2.45510700 | -0.85146800 | 0.01385600  |
| C | -4.03880100 | 0.83695800  | -0.44758700 |
| H | -2.47327000 | 0.24732800  | -1.81090200 |
| C | -1.56334400 | 1.49462800  | -0.33854000 |
| C | -3.81146000 | -1.30558900 | 0.53400500  |
| H | -3.72211800 | -1.49756400 | 1.60890300  |
| O | -1.42082300 | -1.45388900 | 0.18949900  |
| C | -4.67837800 | -0.11071200 | 0.23629100  |
| C | -4.26034600 | -2.59448600 | -0.16804500 |
| H | -4.46829400 | 1.77414800  | -0.78044700 |
| C | -1.41728800 | 1.84416600  | 1.00632500  |
| C | -0.71658300 | 2.06750100  | -1.28532100 |
| H | -5.71760100 | -0.06303700 | 0.54056800  |
| H | -3.56223400 | -3.40668700 | 0.04246600  |
| H | -5.25075700 | -2.88652000 | 0.18597300  |
| H | -4.31234700 | -2.44514700 | -1.24944800 |
| C | -0.42404600 | 2.73360400  | 1.39870000  |
| H | -2.07663200 | 1.40583900  | 1.75071700  |
| C | 0.27430300  | 2.96460400  | -0.89535000 |
| H | -0.82007600 | 1.79405200  | -2.33050600 |
| C | 0.42813100  | 3.29221100  | 0.44786100  |
| H | -0.31005300 | 2.98722100  | 2.44647400  |
| H | 0.93350700  | 3.39679700  | -1.63964600 |

|    |            |             |             |
|----|------------|-------------|-------------|
| H  | 1.20725800 | 3.98059300  | 0.75449000  |
| I  | 1.21706300 | -0.84151200 | 0.02605500  |
| Br | 3.68644500 | -0.40361100 | -0.02750100 |

## 2.4 CatICI

### CatICI

Entropic correction (in solution) = -757.83991 Hartree

Sum of electronic and zero-point Energies = -757.823759 Hartree

Sum of electronic and thermal Free Energies = -757.848211 Hartree

|    |            |            |             |
|----|------------|------------|-------------|
| Cl | 0.00000000 | 0.00000000 | -1.77110700 |
| I  | 0.00000000 | 0.00000000 | 0.56809100  |

### CatICI-COM1

Entropic correction (in solution) = -1297.28051 Hartree

Sum of electronic and zero-point Energies = -1297.241388 Hartree

Sum of electronic and thermal Free Energies = -1297.290699 Hartree

|    |             |             |             |
|----|-------------|-------------|-------------|
| C  | -2.54714100 | 0.85865500  | 0.28641100  |
| C  | 0.33075900  | 1.85314700  | -0.08872300 |
| C  | -2.61852400 | 1.97663400  | -0.45824000 |
| H  | -1.82491100 | 0.82287100  | 1.09995900  |
| C  | -3.39761400 | -0.33054300 | 0.16195300  |
| C  | -0.41779900 | 3.10140000  | 0.00126800  |
| H  | -0.13678400 | 1.00471300  | -0.60584200 |
| O  | 1.48045200  | 1.75001200  | 0.33168100  |
| C  | -1.74199600 | 3.12222700  | -0.28030200 |
| C  | 0.36724700  | 4.33486700  | 0.34083800  |
| H  | -3.41203800 | 2.09416800  | -1.19122000 |
| C  | -4.33724200 | -0.49358800 | -0.86630300 |
| C  | -3.25673100 | -1.35174300 | 1.10953700  |
| H  | -2.21649900 | 4.09783800  | -0.37223200 |
| H  | -0.26625300 | 5.22040300  | 0.29016500  |
| H  | 0.77587200  | 4.25616900  | 1.35191400  |
| H  | 1.21423700  | 4.46097300  | -0.33775300 |
| C  | -5.11516100 | -1.64032600 | -0.93344100 |
| H  | -4.45871400 | 0.27571600  | -1.62020400 |
| C  | -4.03495600 | -2.50205000 | 1.04042900  |
| H  | -2.52722500 | -1.23754700 | 1.90483200  |
| C  | -4.96779400 | -2.64886100 | 0.01918600  |
| H  | -5.83742300 | -1.75313600 | -1.73380500 |
| H  | -3.91120700 | -3.28249000 | 1.78224100  |
| H  | -5.57565800 | -3.54431100 | -0.03901200 |
| I  | 2.68260600  | -0.40640300 | 0.00568600  |
| Cl | 3.79862200  | -2.50323500 | -0.32232500 |

### CatICI-TS1

Imaginary frequency -297.88 cm<sup>-1</sup>

Entropic correction (in solution) = -1297.24519 Hartree

Sum of electronic and zero-point Energies = -1297.209294 Hartree

Sum of electronic and thermal Free Energies = -1297.255485 Hartree

|    |             |             |             |
|----|-------------|-------------|-------------|
| C  | 2.14761000  | 0.75760200  | 0.44348900  |
| C  | 1.64978200  | -0.87343400 | -0.12974600 |
| C  | 3.39997800  | 0.81271500  | -0.26386000 |
| H  | 2.26227500  | 0.43013300  | 1.47653600  |
| C  | 1.12989500  | 1.81968200  | 0.26948300  |
| C  | 3.00662800  | -1.42772500 | -0.23049000 |
| H  | 1.31421200  | -0.52244700 | -1.11968500 |
| O  | 0.76237400  | -1.50767700 | 0.59535100  |
| C  | 3.95123600  | -0.43670300 | -0.48126900 |
| C  | 3.26163100  | -2.86346400 | -0.00960300 |
| H  | 3.81317200  | 1.73697300  | -0.65707900 |
| C  | 0.91176600  | 2.39217800  | -0.98740200 |
| C  | 0.33428000  | 2.21228400  | 1.34808300  |
| H  | 4.95839900  | -0.62724400 | -0.82901600 |
| H  | 4.25673800  | -3.15206100 | -0.34628400 |
| H  | 3.19097100  | -3.05606100 | 1.06872100  |
| H  | 2.48890400  | -3.47408000 | -0.48220800 |
| C  | -0.07777900 | 3.35206000  | -1.15883800 |
| H  | 1.50229900  | 2.06563000  | -1.83911100 |
| C  | -0.65891000 | 3.16966500  | 1.17563600  |
| H  | 0.48814400  | 1.75433000  | 2.31983300  |
| C  | -0.86590600 | 3.74021400  | -0.07715900 |
| H  | -0.24612400 | 3.78640300  | -2.13738300 |
| H  | -1.27741900 | 3.46324300  | 2.01566400  |
| H  | -1.64754300 | 4.47844800  | -0.21426400 |
| I  | -1.36176800 | -1.11791200 | 0.09481300  |
| Cl | -3.77474100 | -0.67664400 | -0.49609200 |

### CatICI-INT1

Entropic correction (in solution) = -1297.24779 Hartree

Sum of electronic and zero-point Energies = -1297.210513 Hartree

Sum of electronic and thermal Free Energies = -1297.258072 Hartree

|   |            |             |             |
|---|------------|-------------|-------------|
| C | 2.10726800 | 0.27445700  | 0.57749400  |
| C | 1.43515900 | -1.03391400 | -0.04405100 |
| C | 3.49747300 | 0.13457500  | 0.10059500  |
| H | 2.10016800 | 0.06308400  | 1.65417100  |
| C | 1.43321400 | 1.58425900  | 0.29403700  |
| C | 2.61622900 | -1.90365000 | -0.27756300 |
| H | 1.15850400 | -0.70510300 | -1.07114600 |
| O | 0.41939000 | -1.61399500 | 0.63234200  |



|    |             |             |             |
|----|-------------|-------------|-------------|
| C  | 3.79041900  | -1.13946200 | -0.31384200 |
| C  | 2.49576100  | -3.35635800 | -0.39722700 |
| H  | 4.19151700  | 0.96936800  | 0.06713900  |
| C  | 1.51767900  | 2.15234800  | -0.97911800 |
| C  | 0.68160000  | 2.22288400  | 1.27972200  |
| H  | 4.76131000  | -1.50451800 | -0.62043800 |
| H  | 3.37691100  | -3.81312300 | -0.84485400 |
| H  | 2.37966600  | -3.74385900 | 0.62613900  |
| H  | 1.57652600  | -3.62671700 | -0.92176300 |
| C  | 0.86372500  | 3.34638600  | -1.26082900 |
| H  | 2.08338600  | 1.64954000  | -1.75987600 |
| C  | 0.02213600  | 3.41469000  | 0.99710600  |
| H  | 0.60276800  | 1.77643200  | 2.26555400  |
| C  | 0.11299000  | 3.97814700  | -0.27228000 |
| H  | 0.93080900  | 3.77822000  | -2.25262700 |
| H  | -0.56784000 | 3.89940400  | 1.76620900  |
| H  | -0.40589900 | 4.90355100  | -0.49385200 |
| I  | -1.55630400 | -0.89775500 | 0.12690500  |
| Cl | -3.91181000 | -0.07055900 | -0.49550800 |

### CatICI-TS2

Imaginary frequency -772.96 cm<sup>-1</sup>

Entropic correction (in solution) = -1297.23864 Hartree

Sum of electronic and zero-point Energies = -1297.202801 Hartree

Sum of electronic and thermal Free Energies = -1297.248965 Hartree

|   |             |             |             |
|---|-------------|-------------|-------------|
| C | -2.12007600 | 0.66182300  | -0.64396000 |
| C | -1.71204600 | -0.78971500 | -0.29995500 |
| C | -3.45355600 | 0.78768100  | 0.02262600  |
| H | -2.27778400 | 0.63747000  | -1.73016000 |
| C | -1.10968700 | 1.72990100  | -0.30651700 |
| C | -2.86677400 | -1.39904100 | 0.29925200  |
| H | -1.57149700 | -0.76059700 | 0.90960100  |
| O | -0.75820800 | -1.44854100 | -0.91371500 |
| C | -3.87066900 | -0.38412100 | 0.54230700  |
| C | -2.97611100 | -2.83880300 | 0.59221800  |
| H | -3.96738900 | 1.73723800  | 0.11613700  |
| C | -0.92088400 | 2.11230600  | 1.02272100  |
| C | -0.30867900 | 2.28776800  | -1.30011500 |
| H | -4.78510000 | -0.56876200 | 1.08924200  |
| H | -3.54566900 | -3.28317900 | -0.23420200 |
| H | -1.99425000 | -3.31107900 | 0.60986300  |
| H | -3.52465700 | -3.02481200 | 1.51574200  |
| C | 0.06545300  | 3.03290100  | 1.35539800  |
| H | -1.53960000 | 1.67504700  | 1.80226000  |
| C | 0.68159700  | 3.20814200  | -0.96785500 |

|    |             |             |             |
|----|-------------|-------------|-------------|
| H  | -0.44692500 | 1.98538000  | -2.33290700 |
| C  | 0.87224400  | 3.57911500  | 0.35917700  |
| H  | 0.21112500  | 3.31844800  | 2.39078000  |
| H  | 1.30902900  | 3.62808800  | -1.74548800 |
| H  | 1.64868300  | 4.28929100  | 0.61877100  |
| I  | 1.33322700  | -1.04596800 | -0.20436900 |
| Cl | 3.65904700  | -0.66033300 | 0.65175600  |

### CatICI-INT2

Entropic correction (in solution) = -1297.30060 Hartree

Sum of electronic and zero-point Energies = -1297.263189 Hartree

Sum of electronic and thermal Free Energies = -1297.310922 Hartree

|    |             |             |             |
|----|-------------|-------------|-------------|
| C  | 2.11691600  | 0.51658800  | 0.74363400  |
| C  | 2.02592100  | -0.79433500 | -0.04454300 |
| C  | 3.55042000  | 0.92406300  | 0.49020000  |
| H  | 1.96988100  | 0.26218700  | 1.80177800  |
| C  | 1.06186500  | 1.52084600  | 0.33769500  |
| C  | 3.40719300  | -1.20819800 | -0.52749400 |
| H  | 3.35710800  | -1.39506000 | -1.60560200 |
| O  | 1.01314200  | -1.41960700 | -0.26825200 |
| C  | 4.23312800  | 0.00540700  | -0.19133500 |
| C  | 3.86662600  | -2.49014400 | 0.18190900  |
| H  | 3.94408400  | 1.86733600  | 0.84889400  |
| C  | 0.93010500  | 1.89187400  | -1.00269200 |
| C  | 0.19031100  | 2.06033500  | 1.28165800  |
| H  | 5.27803500  | 0.08508700  | -0.46798700 |
| H  | 3.87792500  | -2.34665300 | 1.26527300  |
| H  | 3.19880700  | -3.31969200 | -0.05724300 |
| H  | 4.87613700  | -2.75193300 | -0.14008900 |
| C  | -0.07284100 | 2.77116100  | -1.39395400 |
| H  | 1.60940300  | 1.48075600  | -1.74470400 |
| C  | -0.81044000 | 2.94656900  | 0.89297100  |
| H  | 0.28318600  | 1.76921200  | 2.32301400  |
| C  | -0.94876800 | 3.29711500  | -0.44629200 |
| H  | -0.17504900 | 3.04264600  | -2.43843500 |
| H  | -1.48844500 | 3.35341500  | 1.63454900  |
| H  | -1.73484100 | 3.97784300  | -0.75215300 |
| I  | -1.57604100 | -0.96897100 | -0.03664800 |
| Cl | -3.93375300 | -0.70356000 | 0.08768000  |

## 2.5 CatICl<sub>3</sub>

### CatICl<sub>3</sub>

Entropic correction (in solution) = -1678.208020 Hartree

Sum of electronic and zero-point Energies = -1678.186309 Hartree

Sum of electronic and thermal Free Energies = -1678.218734 Hartree

|    |            |             |             |
|----|------------|-------------|-------------|
| I  | 0.00000000 | 0.00000000  | 0.40712200  |
| Cl | 0.00000000 | 2.46406300  | 0.31684800  |
| Cl | 0.00000000 | -2.46406300 | 0.31684800  |
| Cl | 0.00000000 | 0.00000000  | -1.90295900 |

### **Cat[Cl<sub>3</sub>]-COM1**

Entropic correction (in solution) = -2217.653500 Hartree

Sum of electronic and zero-point Energies = -2217.609669 Hartree

Sum of electronic and thermal Free Energies = -2217.663613 Hartree

|    |             |             |             |
|----|-------------|-------------|-------------|
| C  | -2.83702300 | 1.08825200  | 0.23183500  |
| C  | 0.04686700  | 1.93501300  | -0.02287500 |
| C  | -2.84633200 | 2.25826000  | -0.43832000 |
| H  | -2.15389400 | 0.97571800  | 1.07178900  |
| C  | -3.72366200 | -0.05356200 | -0.00626000 |
| C  | -0.60716600 | 3.21336800  | 0.15553800  |
| H  | -0.45185100 | 1.17722100  | -0.63969900 |
| O  | 1.17431700  | 1.70578900  | 0.43541000  |
| C  | -1.92083500 | 3.33830700  | -0.16674600 |
| C  | 0.23901700  | 4.35926100  | 0.62907700  |
| H  | -3.62509000 | 2.46310900  | -1.16755000 |
| C  | -4.48089500 | -0.19071100 | -1.17856100 |
| C  | -3.80441900 | -1.05461000 | 0.97013100  |
| H  | -2.33158400 | 4.34540700  | -0.20874400 |
| H  | -0.32919400 | 5.28908800  | 0.60439400  |
| H  | 0.57322900  | 4.18339100  | 1.65520800  |
| H  | 1.13403300  | 4.46971500  | 0.01274600  |
| C  | -5.30935900 | -1.28950700 | -1.35516000 |
| H  | -4.41043100 | 0.55595500  | -1.96153400 |
| C  | -4.63518700 | -2.15473200 | 0.79221800  |
| H  | -3.21071500 | -0.96177100 | 1.87362500  |
| C  | -5.39137200 | -2.27336500 | -0.36985300 |
| H  | -5.88680200 | -1.38656500 | -2.26725500 |
| H  | -4.68852200 | -2.92025900 | 1.55750300  |
| H  | -6.03635000 | -3.13247500 | -0.51389200 |
| I  | 2.11725500  | -0.47321400 | 0.06353300  |
| Cl | 3.00485100  | -2.64563900 | -0.26927500 |
| Cl | 4.15665300  | 0.59275200  | -0.86282300 |
| Cl | -0.01854400 | -1.39889700 | 0.99602600  |

### **Cat[Cl<sub>3</sub>]-TS1**

Imaginary frequency -335.86 cm<sup>-1</sup>

Entropic correction (in solution) = -2217.629710 Hartree

Sum of electronic and zero-point Energies = -2217.588670 Hartree

Sum of electronic and thermal Free Energies = -2217.639908 Hartree

|   |            |            |            |
|---|------------|------------|------------|
| C | 2.24101400 | 1.08240000 | 0.55046600 |
|---|------------|------------|------------|

|    |             |             |             |
|----|-------------|-------------|-------------|
| C  | 1.94176400  | -0.69320000 | -0.11545400 |
| C  | 3.53689700  | 1.18129900  | -0.03306000 |
| H  | 2.22578400  | 0.69633800  | 1.56802900  |
| C  | 1.15316600  | 2.02421900  | 0.23101100  |
| C  | 3.33114600  | -1.09840900 | 0.03521900  |
| H  | 1.71574000  | -0.29179700 | -1.10911800 |
| O  | 1.00615500  | -1.40163200 | 0.46509700  |
| C  | 4.20641400  | -0.03135400 | -0.12102200 |
| C  | 3.68385600  | -2.49530100 | 0.37468300  |
| H  | 3.91227300  | 2.10913500  | -0.45475600 |
| C  | 0.98318700  | 2.48941700  | -1.07839000 |
| C  | 0.22503600  | 2.37937200  | 1.21377500  |
| H  | 5.26496100  | -0.14498300 | -0.31877800 |
| H  | 4.74820900  | -2.67818300 | 0.23159200  |
| H  | 3.44237300  | -2.66637500 | 1.43078800  |
| H  | 3.08583300  | -3.20270200 | -0.20380500 |
| C  | -0.09978300 | 3.29753600  | -1.39741500 |
| H  | 1.68349800  | 2.18787800  | -1.85249300 |
| C  | -0.86040700 | 3.18574200  | 0.89245100  |
| H  | 0.34649300  | 2.00539400  | 2.22430300  |
| C  | -1.02578200 | 3.64076700  | -0.41303400 |
| H  | -0.23535800 | 3.64361100  | -2.41526500 |
| H  | -1.58391200 | 3.44586200  | 1.65613100  |
| H  | -1.88210100 | 4.25446300  | -0.66767000 |
| I  | -1.06500100 | -0.92607000 | 0.02843500  |
| Cl | -3.43896900 | -0.38686700 | -0.44328500 |
| Cl | -0.52351400 | -1.32736700 | -2.39928000 |
| Cl | -1.34498800 | -0.57040200 | 2.48067100  |

### **Cat[Cl<sub>3</sub>]-INT1**

Entropic correction (in solution) = -2217.638240 Hartree

Sum of electronic and zero-point Energies = -2217.595920 Hartree

Sum of electronic and thermal Free Energies = -2217.648418 Hartree

|   |            |             |             |
|---|------------|-------------|-------------|
| C | 2.11618800 | 0.28532000  | 0.71423100  |
| C | 1.60938400 | -1.00149800 | -0.02984400 |
| C | 3.58433000 | 0.10187800  | 0.63526900  |
| H | 1.82075800 | 0.14879300  | 1.76446700  |
| C | 1.62218200 | 1.61476000  | 0.20174100  |
| C | 2.79060600 | -1.90375200 | -0.00332800 |
| H | 1.53061300 | -0.71428000 | -1.09891000 |
| O | 0.46759900 | -1.61970300 | 0.42829100  |
| C | 3.94956300 | -1.16906700 | 0.26942100  |
| C | 2.66977100 | -3.34352100 | -0.21591300 |
| H | 4.27904500 | 0.91162000  | 0.83672200  |
| C | 1.93262900 | 2.00924900  | -1.10179000 |

|    |             |             |             |
|----|-------------|-------------|-------------|
| C  | 0.84118900  | 2.44584600  | 1.00340100  |
| H  | 4.95846500  | -1.55406600 | 0.21354900  |
| H  | 3.62979200  | -3.82194800 | -0.39874100 |
| H  | 2.22816600  | -3.75901800 | 0.70260100  |
| H  | 1.94525400  | -3.55358400 | -1.00752200 |
| C  | 1.46277200  | 3.21893100  | -1.59978800 |
| H  | 2.53157400  | 1.35941500  | -1.73557800 |
| C  | 0.36753500  | 3.65496000  | 0.50316300  |
| H  | 0.58978400  | 2.13872500  | 2.01256500  |
| C  | 0.67611900  | 4.04208600  | -0.79743500 |
| H  | 1.70203900  | 3.51452500  | -2.61460600 |
| H  | -0.24943300 | 4.28981200  | 1.12825300  |
| H  | 0.30024900  | 4.98051300  | -1.18794100 |
| I  | -1.32237000 | -0.65824700 | 0.07043800  |
| Cl | -3.58187100 | 0.47238100  | -0.36346500 |
| Cl | -0.99029200 | -1.29368100 | -2.34316100 |
| Cl | -1.34872500 | -0.10969500 | 2.51549700  |

### **CatICl<sub>3</sub>-TS2**

Imaginary frequency -744.23 cm<sup>-1</sup>

Entropic correction (in solution) = -2217.62617 Hartree

Sum of electronic and zero-point Energies = -2217.586178 Hartree

Sum of electronic and thermal Free Energies = -2217.636424 Hartree

|   |             |             |             |
|---|-------------|-------------|-------------|
| C | 2.11732000  | 0.99982500  | 0.81680900  |
| C | 1.92229900  | -0.49070700 | 0.50664900  |
| C | 3.53861800  | 1.22374700  | 0.39943600  |
| H | 2.06041200  | 1.06126100  | 1.91202700  |
| C | 1.08445400  | 1.91813000  | 0.20598100  |
| C | 3.19759800  | -1.02312700 | 0.15258500  |
| H | 2.04001100  | -0.56882900 | -0.71847100 |
| O | 0.91383800  | -1.22612700 | 0.94361400  |
| C | 4.14204800  | 0.07616200  | 0.03792500  |
| C | 3.47934500  | -2.45804800 | -0.03998200 |
| H | 3.97664400  | 2.21330400  | 0.35252900  |
| C | 1.03025300  | 2.06812300  | -1.18124700 |
| C | 0.12161000  | 2.53141300  | 1.00329600  |
| H | 5.15421900  | -0.04966300 | -0.32054700 |
| H | 3.94477800  | -2.81351300 | 0.88785400  |
| H | 2.56112400  | -3.02377400 | -0.19526900 |
| H | 4.18605100  | -2.61964000 | -0.85415700 |
| C | 0.00340800  | 2.79756400  | -1.76664300 |
| H | 1.78073800  | 1.59004100  | -1.80624000 |
| C | -0.90848100 | 3.26258400  | 0.41701300  |
| H | 0.16051600  | 2.41237500  | 2.08047200  |
| C | -0.97421600 | 3.38743000  | -0.96674400 |

|    |             |             |             |
|----|-------------|-------------|-------------|
| H  | -0.04322000 | 2.89537600  | -2.84495300 |
| H  | -1.66626800 | 3.72061400  | 1.04201500  |
| H  | -1.78526600 | 3.94230400  | -1.42379900 |
| I  | -1.05179200 | -0.86112700 | 0.12022200  |
| Cl | -3.31215300 | -0.55238200 | -0.87674800 |
| Cl | 0.03684900  | -1.49829800 | -2.08229600 |
| Cl | -1.81063900 | -0.24753500 | 2.39771400  |

### **CatICl<sub>3</sub>-INT2**

Entropic correction (in solution) = -2217.67542 Hartree

Sum of electronic and zero-point Energies = -2217.633810 Hartree

Sum of electronic and thermal Free Energies = -2217.685663 Hartree

|    |             |             |             |
|----|-------------|-------------|-------------|
| C  | 2.42275300  | 0.69648900  | 0.68397100  |
| C  | 2.31514800  | -0.66282900 | -0.01093200 |
| C  | 3.80437100  | 1.14028200  | 0.26005600  |
| H  | 2.39896100  | 0.49590100  | 1.76429600  |
| C  | 1.27301400  | 1.61273000  | 0.33787500  |
| C  | 3.67126800  | -1.08012300 | -0.54969100 |
| H  | 3.55018200  | -1.37967100 | -1.59599900 |
| O  | 1.30082200  | -1.31645000 | -0.14602000 |
| C  | 4.46714200  | 0.19020600  | -0.39755600 |
| C  | 4.23199900  | -2.26613500 | 0.24976500  |
| H  | 4.18289100  | 2.12604700  | 0.50079600  |
| C  | 0.99430000  | 1.90444900  | -1.00063700 |
| C  | 0.43727700  | 2.11496500  | 1.33440900  |
| H  | 5.47942500  | 0.28255700  | -0.77318800 |
| H  | 4.31389200  | -2.01285700 | 1.30952400  |
| H  | 3.58560000  | -3.13899200 | 0.14292800  |
| H  | 5.22626500  | -2.52200600 | -0.12035800 |
| C  | -0.12615500 | 2.65469700  | -1.33708800 |
| H  | 1.64308900  | 1.51941200  | -1.78301900 |
| C  | -0.68499600 | 2.86743600  | 0.99878000  |
| H  | 0.64945500  | 1.89116600  | 2.37427300  |
| C  | -0.97530900 | 3.12735300  | -0.33760500 |
| H  | -0.34742600 | 2.85605100  | -2.37884800 |
| H  | -1.33866400 | 3.23730400  | 1.78059100  |
| H  | -1.85742800 | 3.69964000  | -0.60106100 |
| I  | -1.24526000 | -0.73534600 | -0.01669000 |
| Cl | -3.54694300 | -0.33332300 | 0.03286500  |
| Cl | -1.29181200 | -0.69873100 | -2.49705800 |
| Cl | -1.21294600 | -0.81187100 | 2.46682300  |

## CatICl<sub>3</sub>(a)—The indirect hydrogen proton transfer reaction pathway with H<sub>2</sub>O

### (a<sub>1</sub>) One-step water co-catalyzed mechanism

#### H<sub>2</sub>O

Entropic correction (in solution) = -76.411380 Hartree

Sum of electronic and zero-point Energies = -76.406339 Hartree

Sum of electronic and thermal Free Energies = -76.423983 Hartree

|   |            |             |             |
|---|------------|-------------|-------------|
| O | 0.00000000 | 0.00000000  | 0.11764200  |
| H | 0.00000000 | 0.76109700  | -0.47056700 |
| H | 0.00000000 | -0.76109700 | -0.47056700 |

#### Cat ICl<sub>3</sub>-COM3-1

Entropic correction (in solution) = -2294.09090 Hartree

Sum of electronic and zero-point Energies = -2294.045059 Hartree

Sum of electronic and thermal Free Energies = -2294.101200 Hartree

|   |             |             |             |
|---|-------------|-------------|-------------|
| C | 2.33478000  | 0.70506200  | 0.68629000  |
| C | 2.22367700  | -0.23602000 | -0.51294600 |
| C | 3.60697100  | 1.45229200  | 0.35155100  |
| H | 2.50415600  | 0.05095100  | 1.55200200  |
| C | 1.08506700  | 1.51543600  | 0.91688700  |
| C | 3.55613900  | -0.29831100 | -1.23827900 |
| H | 3.36837500  | -0.22093200 | -2.31361400 |
| O | 1.22158300  | -0.80673800 | -0.89660700 |
| C | 4.26017200  | 0.91008100  | -0.67517800 |
| C | 4.28197800  | -1.62159200 | -0.94797200 |
| H | 3.93094400  | 2.30996000  | 0.92823900  |
| C | 0.62148500  | 2.38478200  | -0.07487300 |
| C | 0.33686400  | 1.34834500  | 2.08216700  |
| H | 5.20974900  | 1.25714100  | -1.06513700 |
| H | 3.69059900  | -2.46821000 | -1.30310200 |
| H | 5.24352400  | -1.62967800 | -1.46469800 |
| H | 4.46106700  | -1.73377200 | 0.12292500  |
| C | -0.58966300 | 3.04833000  | 0.08273000  |
| H | 1.20109700  | 2.52132800  | -0.98379000 |
| C | -0.87671500 | 2.01189600  | 2.24123700  |
| H | 0.69345100  | 0.67541200  | 2.85497900  |
| C | -1.34731800 | 2.85302800  | 1.23661100  |
| H | -0.95177200 | 3.70396600  | -0.70078900 |
| H | -1.45918500 | 1.86095500  | 3.14304700  |
| H | -2.29880600 | 3.35931200  | 1.35286500  |
| I | -1.30024400 | -0.60590800 | -0.40231500 |
| O | 2.29391600  | -2.36175400 | 1.63581600  |
| H | 2.49815200  | -3.17859200 | 1.16983500  |
| H | 1.33093300  | -2.35005500 | 1.70175100  |

|    |             |             |             |
|----|-------------|-------------|-------------|
| Cl | -3.61411000 | -0.54310300 | -0.06513400 |
| Cl | -1.04594900 | -1.91045400 | 1.73496000  |
| Cl | -1.55135000 | 0.62198700  | -2.52128600 |

**Cat ICl<sub>3</sub>-TS3-1**

Imaginary frequency -297.55 cm<sup>-1</sup>

Entropic correction (in solution) = -2294.032880 Hartree

Sum of electronic and zero-point Energies = -2293.989518 Hartree

Sum of electronic and thermal Free Energies = -2294.043103 Hartree

|    |             |             |             |
|----|-------------|-------------|-------------|
| C  | 1.99042100  | 0.39213400  | -0.34987000 |
| C  | 1.58643400  | -0.81012100 | 0.19054300  |
| C  | 3.24314500  | 0.13854700  | -1.08377000 |
| H  | 3.07857700  | 0.43446900  | 1.45711600  |
| C  | 1.27657100  | 1.67965600  | -0.32180300 |
| C  | 2.56273100  | -1.90326800 | -0.19669200 |
| H  | 2.01135200  | -2.49724200 | -0.94277500 |
| O  | 0.51773000  | -1.10756200 | 0.89245700  |
| C  | 3.62656000  | -1.15040700 | -0.94558500 |
| C  | 3.00226500  | -2.83474400 | 0.93218900  |
| H  | 3.77345100  | 0.90556600  | -1.63784100 |
| C  | 1.28130000  | 2.51980800  | -1.44242700 |
| C  | 0.56901200  | 2.08302600  | 0.81844900  |
| H  | 4.50545700  | -1.61187600 | -1.37755200 |
| H  | 2.12867800  | -3.30154500 | 1.38899100  |
| H  | 3.65020300  | -3.62094300 | 0.54074800  |
| H  | 3.54878800  | -2.30280900 | 1.71509500  |
| C  | 0.58816300  | 3.72487400  | -1.42410100 |
| H  | 1.80845100  | 2.21451500  | -2.33989600 |
| C  | -0.12781300 | 3.28531600  | 0.83238600  |
| H  | 0.55407600  | 1.44390500  | 1.69545500  |
| C  | -0.12100500 | 4.11075300  | -0.28912100 |
| H  | 0.59140800  | 4.35879100  | -2.30350600 |
| H  | -0.68005500 | 3.57391300  | 1.71958300  |
| H  | -0.66794400 | 5.04632200  | -0.28039100 |
| I  | -1.45310300 | -0.69275000 | 0.10541000  |
| O  | 4.04808300  | 0.25988300  | 1.64715100  |
| H  | 4.37428900  | -0.05132500 | 0.74541400  |
| H  | 4.50558500  | 1.07973700  | 1.92828100  |
| Cl | -3.75992300 | -0.31526000 | -0.78728100 |
| Cl | -2.05126000 | 0.17645100  | 2.37450300  |
| Cl | -0.63358500 | -1.60164600 | -2.08919300 |

**Cat ICl<sub>3</sub>-INT3-1**

Entropic correction (in solution) = -2294.10330 Hartree

Sum of electronic and zero-point Energies = -2294.056438 Hartree

Sum of electronic and thermal Free Energies = -2294.113557 Hartree



|    |             |             |             |
|----|-------------|-------------|-------------|
| C  | 2.08999700  | 0.72689500  | -0.55542100 |
| C  | 2.01885300  | -0.63925900 | -0.00978800 |
| C  | 3.29156400  | 0.88293500  | -1.13643300 |
| H  | 3.53716400  | 1.64598100  | 1.80053300  |
| C  | 0.98661500  | 1.69339300  | -0.39915500 |
| C  | 3.26641100  | -1.39726400 | -0.40163400 |
| H  | 2.91828000  | -2.05800900 | -1.20751600 |
| O  | 1.07511900  | -1.13916100 | 0.59997200  |
| C  | 4.17541400  | -0.32022600 | -1.00733600 |
| C  | 3.86050800  | -2.24454900 | 0.71600400  |
| H  | 3.61878100  | 1.79951900  | -1.61668500 |
| C  | 0.34591100  | 2.24118000  | -1.51299000 |
| C  | 0.51863700  | 1.99775100  | 0.88383000  |
| H  | 4.60511300  | -0.61295100 | -1.96837200 |
| H  | 3.11664000  | -2.94303300 | 1.10352300  |
| H  | 4.70766800  | -2.82062200 | 0.33811500  |
| H  | 4.20360100  | -1.60592500 | 1.53076800  |
| C  | -0.76050400 | 3.06721900  | -1.34514700 |
| H  | 0.69555000  | 1.98874200  | -2.50798000 |
| C  | -0.58101000 | 2.83253900  | 1.04882300  |
| H  | 1.00213200  | 1.55540600  | 1.74889600  |
| C  | -1.22954000 | 3.35821400  | -0.06564600 |
| H  | -1.26462600 | 3.47447800  | -2.21401100 |
| H  | -0.94400000 | 3.05468400  | 2.04559600  |
| H  | -2.09938000 | 3.99230000  | 0.06167500  |
| I  | -1.35371800 | -0.76716900 | 0.09256800  |
| O  | 3.62168000  | 0.72377900  | 2.06620200  |
| H  | 5.00945800  | -0.08347500 | -0.33718900 |
| H  | 3.63474900  | 0.74135200  | 3.02915400  |
| Cl | -3.62677200 | -0.64881100 | -0.50541000 |
| Cl | -1.92223600 | -0.36424300 | 2.47480400  |
| Cl | -0.71367500 | -1.18332300 | -2.28307800 |

**(a<sub>2</sub>) Two-step hydrogen bond/ halogen bond co-catalyzed mechanism**

**H<sub>2</sub>O**

Entropic correction (in solution) = -76.411380 Hartree

Sum of electronic and zero-point Energies = -76.406339 Hartree

Sum of electronic and thermal Free Energies = -76.423983 Hartree

|   |            |             |             |
|---|------------|-------------|-------------|
| O | 0.00000000 | 0.00000000  | 0.11764200  |
| H | 0.00000000 | 0.76109700  | -0.47056700 |
| H | 0.00000000 | -0.76109700 | -0.47056700 |

**Cat ICl<sub>3</sub>-COM3-2**

Entropic correction (in solution) = -2294.090920 Hartree

Sum of electronic and zero-point Energies = -2294.045061 Hartree

Sum of electronic and thermal Free Energies = -2294.101220 Hartree

|    |             |             |             |
|----|-------------|-------------|-------------|
| C  | 2.33464300  | 0.70521100  | 0.68615000  |
| C  | 2.22361200  | -0.23614500 | -0.51288700 |
| C  | 3.60694700  | 1.45223900  | 0.35141500  |
| H  | 2.50387000  | 0.05124600  | 1.55200900  |
| C  | 1.08499700  | 1.51578100  | 0.91640900  |
| C  | 3.55613100  | -0.29863500 | -1.23811700 |
| H  | 3.36841000  | -0.22132900 | -2.31346800 |
| O  | 1.22153900  | -0.80692700 | -0.89649900 |
| C  | 4.26022000  | 0.90977800  | -0.67513400 |
| C  | 4.28185000  | -1.62193400 | -0.94767800 |
| H  | 3.93093200  | 2.31000100  | 0.92795500  |
| C  | 0.62151400  | 2.38477600  | -0.07570000 |
| C  | 0.33677800  | 1.34927800  | 2.08177100  |
| H  | 5.20987100  | 1.25668400  | -1.06504900 |
| H  | 4.46097200  | -1.73400100 | 0.12322300  |
| H  | 3.69037700  | -2.46854300 | -1.30267300 |
| H  | 5.24337600  | -1.63018800 | -1.46443800 |
| C  | -0.58954900 | 3.04855100  | 0.08163600  |
| H  | 1.20113900  | 2.52088700  | -0.98467500 |
| C  | -0.87669800 | 2.01307000  | 2.24058600  |
| H  | 0.69329000  | 0.67663400  | 2.85486700  |
| C  | -1.34720300 | 2.85385100  | 1.23561300  |
| H  | -0.95157300 | 3.70391000  | -0.70215400 |
| H  | -1.45917200 | 1.86260400  | 3.14247200  |
| H  | -2.29861600 | 3.36032000  | 1.35167800  |
| I  | -1.30024900 | -0.60609300 | -0.40207400 |
| Cl | -3.61412800 | -0.54330500 | -0.06499300 |
| Cl | -1.55133800 | 0.62102200  | -2.52149300 |
| Cl | -1.04587700 | -1.90977500 | 1.73572800  |
| O  | 2.29404200  | -2.36147500 | 1.63602700  |
| H  | 1.33109300  | -2.34966100 | 1.70245900  |
| H  | 2.49794800  | -3.17835700 | 1.16997200  |

### Cat ICl<sub>3</sub>-TS3-2

Imaginary frequency -465.41 cm<sup>-1</sup>

Entropic correction (in solution) = -2294.04896 Hartree

Sum of electronic and zero-point Energies = -2294.007035 Hartree

Sum of electronic and thermal Free Energies = -2294.059244 Hartree

|   |            |             |             |
|---|------------|-------------|-------------|
| C | 2.05105800 | 0.93831700  | -0.13556500 |
| C | 1.96239400 | -0.35968500 | -0.63658300 |
| C | 3.46709500 | 1.36588300  | -0.30190600 |
| H | 2.24872900 | 0.17814600  | 1.20843600  |
| C | 0.88260300 | 1.84911300  | 0.03072900  |
| C | 3.33722100 | -0.83872700 | -1.05997500 |

|    |             |             |             |
|----|-------------|-------------|-------------|
| H  | 3.27072500  | -1.00297500 | -2.14504900 |
| O  | 0.96018000  | -1.17286600 | -0.71772700 |
| C  | 4.20594700  | 0.35998200  | -0.78690200 |
| C  | 3.76835100  | -2.14509200 | -0.38936100 |
| H  | 3.81237900  | 2.35520400  | -0.02829600 |
| C  | 0.18034100  | 2.24488100  | -1.11320700 |
| C  | 0.41732700  | 2.26187100  | 1.28179200  |
| H  | 5.27102500  | 0.37376600  | -0.97761900 |
| H  | 3.86316900  | -2.01532400 | 0.69081400  |
| H  | 3.03534000  | -2.92944600 | -0.58446400 |
| H  | 4.73461600  | -2.46618100 | -0.78186500 |
| C  | -0.98739700 | 2.99136600  | -1.00573900 |
| H  | 0.54039600  | 1.93443900  | -2.08859800 |
| C  | -0.75226300 | 3.00796900  | 1.39165500  |
| H  | 0.95088500  | 1.98632400  | 2.18539300  |
| C  | -1.46422600 | 3.36179400  | 0.24917500  |
| H  | -1.53319400 | 3.26930100  | -1.90020900 |
| H  | -1.11305700 | 3.30165800  | 2.37057100  |
| H  | -2.38477100 | 3.92716100  | 0.33627900  |
| I  | -1.13915800 | -0.85572500 | -0.13507800 |
| Cl | -3.50744100 | -0.65551900 | 0.44095800  |
| Cl | -1.61932700 | -0.51228800 | -2.47375400 |
| Cl | -0.47146000 | -1.24934900 | 2.41149100  |
| O  | 2.33598100  | -0.35514400 | 2.21023900  |
| H  | 1.41520600  | -0.69422000 | 2.42840400  |
| H  | 2.65382200  | 0.22524800  | 2.92274500  |

### Cat ICl<sub>3</sub>-INT3-2

Entropic correction (in solution) = -2294.052130 Hartree

Sum of electronic and zero-point Energies = -2294.010560 Hartree

Sum of electronic and thermal Free Energies = -2294.062421 Hartree

|   |             |             |             |
|---|-------------|-------------|-------------|
| C | 1.79832000  | 1.06256700  | -0.55345600 |
| C | 1.59840500  | -0.15805200 | -1.13392000 |
| C | 3.24389800  | 1.21671500  | -0.35910000 |
| H | 2.17439600  | -0.95384300 | 1.89574300  |
| C | 0.78557600  | 2.05301800  | -0.15731500 |
| C | 2.92210800  | -0.84108300 | -1.40139100 |
| H | 3.07802400  | -0.81307300 | -2.49075000 |
| O | 0.47531600  | -0.78817500 | -1.45928200 |
| C | 3.90990700  | 0.12335800  | -0.80023700 |
| C | 2.99682900  | -2.29997600 | -0.94914900 |
| H | 3.69675000  | 2.11519400  | 0.04720800  |
| C | -0.29312100 | 2.34065100  | -1.00148900 |
| C | 0.87117600  | 2.71285100  | 1.07406100  |
| H | 4.98438400  | 0.00222500  | -0.85272000 |

|    |             |             |             |
|----|-------------|-------------|-------------|
| H  | 2.89686000  | -2.40432700 | 0.13293000  |
| H  | 2.19330600  | -2.87396800 | -1.41348200 |
| H  | 3.95246900  | -2.73639400 | -1.24495800 |
| C  | -1.27965900 | 3.23805200  | -0.60912500 |
| H  | -0.35457700 | 1.85331700  | -1.96857500 |
| C  | -0.11102500 | 3.61708800  | 1.46262800  |
| H  | 1.70381600  | 2.50268400  | 1.73850400  |
| C  | -1.19405600 | 3.87625300  | 0.62575700  |
| H  | -2.11514600 | 3.44034300  | -1.26988500 |
| H  | -0.03677500 | 4.11343000  | 2.42353500  |
| H  | -1.96437500 | 4.57386300  | 0.93313100  |
| I  | -1.14309700 | -0.90558500 | -0.10933800 |
| Cl | -3.14653900 | -1.10097500 | 1.38651600  |
| Cl | -2.52970100 | -0.20748700 | -1.91264400 |
| Cl | 0.57155100  | -1.72783800 | 1.87134200  |
| O  | 3.15337200  | -0.56383000 | 1.96404900  |
| H  | 3.20019300  | 0.09014000  | 2.68537800  |
| H  | 3.43489900  | -0.12912700 | 1.08853400  |

### Cat ICl<sub>3</sub>-TS4-2

Imaginary frequency -749.23 cm<sup>-1</sup>

Entropic correction (in solution) = -2294.053010 Hartree

Sum of electronic and zero-point Energies = -2294.011056 Hartree

Sum of electronic and thermal Free Energies = -2294.063311 Hartree

|   |             |             |             |
|---|-------------|-------------|-------------|
| C | 1.72431300  | 1.21929100  | -0.52445100 |
| C | 1.65683900  | -0.03066900 | -1.11821100 |
| C | 3.10725600  | 1.49302800  | -0.28111000 |
| H | 2.49906700  | -0.86274800 | 1.82286600  |
| C | 0.58956200  | 2.07823100  | -0.14485700 |
| C | 3.04430200  | -0.58161200 | -1.34535600 |
| H | 3.26108400  | -0.43724500 | -2.41496700 |
| O | 0.61658800  | -0.75438000 | -1.42686100 |
| C | 3.91415000  | 0.42751700  | -0.61701500 |
| C | 3.19469300  | -2.06686900 | -1.02286100 |
| H | 3.46126200  | 2.43023900  | 0.13746900  |
| C | -0.43879800 | 2.33368900  | -1.05806800 |
| C | 0.49817100  | 2.60979500  | 1.14577500  |
| H | 4.98755700  | 0.49564300  | -0.74877100 |
| H | 2.89971100  | -2.29966200 | 0.00222200  |
| H | 2.56430400  | -2.65766700 | -1.68832900 |
| H | 4.23219900  | -2.37656400 | -1.16112100 |
| C | -1.54905300 | 3.07988900  | -0.67936300 |
| H | -0.36980900 | 1.93307700  | -2.06405200 |
| C | -0.60881100 | 3.36242900  | 1.52164600  |
| H | 1.28691200  | 2.40679600  | 1.86376300  |

|    |             |             |             |
|----|-------------|-------------|-------------|
| C  | -1.63943100 | 3.59165700  | 0.61259200  |
| H  | -2.34625900 | 3.25705700  | -1.39237000 |
| H  | -0.67550500 | 3.75749600  | 2.52890800  |
| H  | -2.50865100 | 4.16663400  | 0.91016900  |
| I  | -1.07664800 | -0.94297100 | -0.09351300 |
| Cl | -3.04464400 | -1.27218200 | 1.36944900  |
| Cl | -2.47399600 | -0.42791600 | -1.98106400 |
| Cl | 0.62698300  | -1.48787900 | 1.89244900  |
| O  | 3.46267400  | -0.58241900 | 1.80876300  |
| H  | 3.62579900  | -0.00216900 | 2.57200400  |
| H  | 3.70957300  | -0.04167400 | 0.82667500  |

### Cat ICl<sub>3</sub>-INT4-2

Entropic correction (in solution) = -2294.104520 Hartree

Sum of electronic and zero-point Energies = -2294.058970 Hartree

Sum of electronic and thermal Free Energies = -2294.114817 Hartree

|    |             |             |             |
|----|-------------|-------------|-------------|
| C  | 2.05398600  | 1.05969600  | -0.48232400 |
| C  | 1.94189100  | -0.27337000 | -1.08203800 |
| C  | 3.35763900  | 1.30054400  | -0.24765200 |
| H  | 2.37742600  | -0.39365600 | 2.11069000  |
| C  | 0.87221900  | 1.88332900  | -0.16241500 |
| C  | 3.32322600  | -0.83491200 | -1.33971500 |
| H  | 3.45917600  | -0.83498100 | -2.42710200 |
| O  | 0.90236800  | -0.89371500 | -1.31390300 |
| C  | 4.26045000  | 0.19329600  | -0.68632000 |
| C  | 3.45296700  | -2.25987500 | -0.80646800 |
| H  | 3.73088100  | 2.20526600  | 0.22056000  |
| C  | -0.01968700 | 2.23949200  | -1.17917700 |
| C  | 0.58223300  | 2.22815600  | 1.15985400  |
| H  | 5.03703100  | 0.56250800  | -1.36073100 |
| H  | 3.28790900  | -2.27580200 | 0.27409700  |
| H  | 2.72414100  | -2.91829700 | -1.28144400 |
| H  | 4.45420500  | -2.64558300 | -1.00706200 |
| C  | -1.19670200 | 2.91321500  | -0.87386800 |
| H  | 0.20266700  | 1.97149000  | -2.20708600 |
| C  | -0.60097000 | 2.89303800  | 1.46422600  |
| H  | 1.26951100  | 1.94439200  | 1.94980500  |
| C  | -1.49577100 | 3.22710000  | 0.44983800  |
| H  | -1.88788200 | 3.17682200  | -1.66593400 |
| H  | -0.82984600 | 3.14016600  | 2.49447000  |
| H  | -2.42287500 | 3.73449900  | 0.69074800  |
| I  | -1.25330800 | -0.79013100 | -0.07477400 |
| Cl | -3.25112800 | -0.92006500 | 1.16468900  |
| Cl | -2.49834600 | -0.37392400 | -2.15308800 |
| Cl | 0.09949600  | -1.23577700 | 2.01505800  |

|   |            |             |            |
|---|------------|-------------|------------|
| O | 3.30894900 | -0.26015900 | 2.32557800 |
| H | 3.43546600 | -0.74276300 | 3.14892900 |
| H | 4.75772400 | -0.22835100 | 0.19286300 |

### CatICl<sub>3</sub>(b) – The direct proton transfer mechanism

#### CatICl<sub>3</sub>-INT2

Entropic correction (in solution) = -2217.67542 Hartree

Sum of electronic and zero-point Energies = -2217.633810 Hartree

Sum of electronic and thermal Free Energies = -2217.685663 Hartree

|    |             |             |             |
|----|-------------|-------------|-------------|
| C  | 2.42275300  | 0.69648900  | 0.68397100  |
| C  | 2.31514800  | -0.66282900 | -0.01093200 |
| C  | 3.80437100  | 1.14028200  | 0.26005600  |
| H  | 2.39896100  | 0.49590100  | 1.76429600  |
| C  | 1.27301400  | 1.61273000  | 0.33787500  |
| C  | 3.67126800  | -1.08012300 | -0.54969100 |
| H  | 3.55018200  | -1.37967100 | -1.59599900 |
| O  | 1.30082200  | -1.31645000 | -0.14602000 |
| C  | 4.46714200  | 0.19020600  | -0.39755600 |
| C  | 4.23199900  | -2.26613500 | 0.24976500  |
| H  | 4.18289100  | 2.12604700  | 0.50079600  |
| C  | 0.99430000  | 1.90444900  | -1.00063700 |
| C  | 0.43727700  | 2.11496500  | 1.33440900  |
| H  | 5.47942500  | 0.28255700  | -0.77318800 |
| H  | 4.31389200  | -2.01285700 | 1.30952400  |
| H  | 3.58560000  | -3.13899200 | 0.14292800  |
| H  | 5.22626500  | -2.52200600 | -0.12035800 |
| C  | -0.12615500 | 2.65469700  | -1.33708800 |
| H  | 1.64308900  | 1.51941200  | -1.78301900 |
| C  | -0.68499600 | 2.86743600  | 0.99878000  |
| H  | 0.64945500  | 1.89116600  | 2.37427300  |
| C  | -0.97530900 | 3.12735300  | -0.33760500 |
| H  | -0.34742600 | 2.85605100  | -2.37884800 |
| H  | -1.33866400 | 3.23730400  | 1.78059100  |
| H  | -1.85742800 | 3.69964000  | -0.60106100 |
| I  | -1.24526000 | -0.73534600 | -0.01669000 |
| Cl | -3.54694300 | -0.33332300 | 0.03286500  |
| Cl | -1.29181200 | -0.69873100 | -2.49705800 |
| Cl | -1.21294600 | -0.81187100 | 2.46682300  |

#### Cat ICl<sub>3</sub>-TS3'

Imaginary frequency -1000.27 cm<sup>-1</sup>

Entropic correction (in solution) = -2217.600520 Hartree

Sum of electronic and zero-point Energies = -2217.559193Hartree

Sum of electronic and thermal Free Energies = -2217.610711 Hartree

|   |            |            |            |
|---|------------|------------|------------|
| C | 2.15539300 | 0.61856600 | 0.03535900 |
|---|------------|------------|------------|

|    |             |             |             |
|----|-------------|-------------|-------------|
| C  | 1.83286300  | -0.63692300 | 0.53263700  |
| C  | 3.57460400  | 0.52232700  | -0.49861500 |
| H  | 3.50954200  | 0.73259500  | 0.68210800  |
| C  | 1.33677500  | 1.83468400  | 0.01089400  |
| C  | 2.96960400  | -1.58851700 | 0.25481600  |
| H  | 2.56883700  | -2.06199600 | -0.67497200 |
| O  | 0.73057700  | -1.05356000 | 1.06253800  |
| C  | 4.04038500  | -0.76827400 | -0.33149100 |
| C  | 3.29096800  | -2.65909300 | 1.28473900  |
| H  | 4.07405400  | 1.33572900  | -1.00737300 |
| C  | 1.36203400  | 2.68491400  | -1.09999100 |
| C  | 0.48111200  | 2.12585900  | 1.08045700  |
| H  | 5.02281800  | -1.13135700 | -0.60255500 |
| H  | 3.68125800  | -2.19883800 | 2.19392800  |
| H  | 2.38693800  | -3.21370000 | 1.53513100  |
| H  | 4.03464900  | -3.35456800 | 0.89439200  |
| C  | 0.53900300  | 3.80440900  | -1.14141100 |
| H  | 2.00921600  | 2.45459500  | -1.93951500 |
| C  | -0.34595500 | 3.24034600  | 1.03030300  |
| H  | 0.46057300  | 1.47122200  | 1.94483100  |
| C  | -0.31901100 | 4.08147900  | -0.08008600 |
| H  | 0.55786800  | 4.45369000  | -2.00901000 |
| H  | -1.01328800 | 3.45095600  | 1.85804400  |
| H  | -0.96692600 | 4.94944200  | -0.11891300 |
| I  | -1.20216300 | -0.77881300 | 0.00671100  |
| Cl | -3.36020200 | -0.58361600 | -1.15592000 |
| Cl | 0.00787600  | -1.50911700 | -2.08626700 |
| Cl | -2.17485900 | -0.06849500 | 2.17879000  |

**Cat ICl<sub>3</sub>-INT3'**

Entropic correction (in solution) = -2217.689290 Hartree

Sum of electronic and zero-point Energies = -2217.647410Hartree

Sum of electronic and thermal Free Energies = -2217.699517 Hartree

|   |            |             |             |
|---|------------|-------------|-------------|
| C | 2.30164400 | 0.84326300  | -0.09773200 |
| C | 2.23485700 | -0.59807500 | 0.18600000  |
| C | 3.53231000 | 1.11989800  | -0.56293700 |
| H | 5.34676100 | 0.11282200  | -0.03610000 |
| C | 1.14316900 | 1.73504600  | 0.10224300  |
| C | 3.59594100 | -1.22148200 | -0.03604600 |
| H | 3.46816700 | -2.03385900 | -0.75645100 |
| O | 1.24302500 | -1.23225200 | 0.53877700  |
| C | 4.43659900 | -0.07260200 | -0.61462700 |
| C | 4.13939200 | -1.78567200 | 1.27973600  |
| H | 3.85699600 | 2.11005600  | -0.86578200 |
| C | 0.54796600 | 2.38819300  | -0.97944300 |

|    |             |             |             |
|----|-------------|-------------|-------------|
| C  | 0.57224400  | 1.84589800  | 1.37421300  |
| H  | 4.74982400  | -0.26605600 | -1.64478100 |
| H  | 4.25664600  | -0.98735900 | 2.01786800  |
| H  | 3.46236800  | -2.53931200 | 1.68527800  |
| H  | 5.11463100  | -2.24648500 | 1.11385500  |
| C  | -0.62036500 | 3.12003200  | -0.79473500 |
| H  | 0.98048100  | 2.28742600  | -1.96862900 |
| C  | -0.58921900 | 2.58720700  | 1.55824400  |
| H  | 1.02967200  | 1.33376100  | 2.21479700  |
| C  | -1.19499200 | 3.21270600  | 0.47126900  |
| H  | -1.08964600 | 3.60742800  | -1.64157700 |
| H  | -1.03177900 | 2.65951400  | 2.54483400  |
| H  | -2.11275100 | 3.77248200  | 0.61025600  |
| I  | -1.17044000 | -0.77505800 | -0.06589800 |
| Cl | -3.39588100 | -0.53970400 | -0.78120600 |
| Cl | -0.37762600 | -0.76515800 | -2.42986400 |
| Cl | -1.90528900 | -0.80812500 | 2.30469900  |

**Pro**

Entropic correction (in solution) = -539.46642 Hartree

Sum of electronic and zero-point Energies = -539.438861 Hartree

Sum of electronic and thermal Free Energies = -539.476977 Hartree

|   |             |             |             |
|---|-------------|-------------|-------------|
| C | 0.40092100  | 0.41327700  | -0.01581800 |
| C | 1.41278900  | -0.60016200 | -0.43020700 |
| C | 1.04536900  | 1.54569200  | 0.30863900  |
| C | -1.05304700 | 0.17450600  | 0.01471400  |
| C | 2.79712200  | 0.03828300  | -0.34726800 |
| H | 3.19906000  | 0.05269800  | -1.36468700 |
| O | 1.19679900  | -1.73984500 | -0.77541800 |
| C | 2.53604200  | 1.46482100  | 0.15760800  |
| C | 3.71727000  | -0.78779900 | 0.54933200  |
| H | 0.55311400  | 2.44429500  | 0.66676800  |
| C | -1.94448400 | 1.20878800  | -0.29480300 |
| C | -1.56799900 | -1.07849400 | 0.36541700  |
| H | 3.02618600  | 1.65593500  | 1.11815900  |
| H | 3.80230700  | -1.80959000 | 0.17496500  |
| H | 4.71565600  | -0.34681000 | 0.58541800  |
| H | 3.32273900  | -0.82564600 | 1.56899800  |
| C | -3.31751300 | 1.00072300  | -0.24077900 |
| H | -1.55567000 | 2.17684300  | -0.59251600 |
| C | -2.94303400 | -1.28404800 | 0.41871600  |
| H | -0.88968000 | -1.88900800 | 0.60000000  |
| C | -3.82152100 | -0.24750000 | 0.11702700  |
| H | -3.99466300 | 1.81098900  | -0.48612700 |
| H | -3.32840000 | -2.25842400 | 0.69690000  |



|   |             |             |             |
|---|-------------|-------------|-------------|
| H | -4.89226100 | -0.41200000 | 0.15528600  |
| H | 2.89572400  | 2.23095500  | -0.53528900 |
